# Supplementary material
Source: Springer Nature journal article supplement (https://www.springermedizin.de/resource/supplementary/12891_2008_621_MOESM2_ESM.pdf/9506384)

Fastrak angles,  
degrees

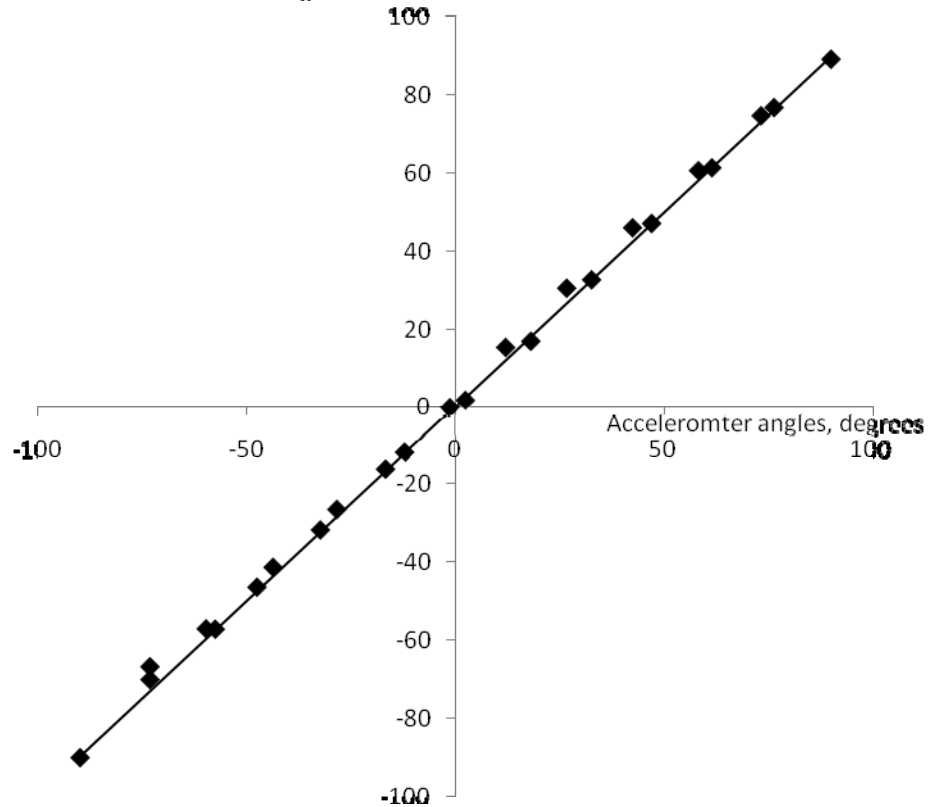

Supplement: MOESM2 [file 9506384]
